# 1 Collective migration of human 2 osteoblasts in direct current electric 3 field

4 Jonathan Edward Dawson<sup>1\*</sup>, Tina Sellmann<sup>2</sup>, Katrin Porath<sup>2</sup>, Rainer Bader<sup>3,4</sup>,  
5 Ursula van Rienen<sup>1,3,5</sup>, Revathi Appali<sup>1,5</sup>, Rüdiger Köhling<sup>2,5,6</sup>

\*For correspondence:

[jonathan.dawson2@uni-rostock.de](mailto:jonathan.dawson2@uni-rostock.de)

Present address: <sup>5</sup>Institute of  
General Electrical Engineering,  
University of Rostock, Rostock,  
Germany

6 <sup>1</sup>Institute of General Electrical Engineering, University of Rostock, Rostock, Germany ;  
7 <sup>2</sup>Oscar-Langendorff-Institute of Physiology, Rostock University Medical Center, Rostock,  
8 Germany; <sup>3</sup>Department of Life, Light and Matter, Interdisciplinary Faculty, University of  
9 Rostock, Rostock, Germany; <sup>4</sup>Biomechanics and Implant Research Lab, Department of  
10 Orthopedics, Rostock University Medical Center, Rostock, Germany; <sup>5</sup>Department of  
11 Ageing of Individuals and Society, Interdisciplinary Faculty, University of Rostock,  
12 Rostock, Germany; <sup>6</sup>Center for Translational Neuroscience Research, Rostock University  
13 Medical Center, Rostock, Germany

---

15 **Abstract** Under both physiological (development, regeneration) and pathological conditions  
16 (cancer metastasis), cells migrate while sensing environmental cues in the form of physical,  
17 chemical or electrical gradients. Although it is known that osteoblasts respond to exogenous  
18 electric fields, the underlying mechanism of electrotactic collective movement of human  
19 osteoblasts is unclear. Theoretical approaches to study electrotactic cell migration until now  
20 mainly used reaction-diffusion models, and did not consider the affect of electric field on  
21 single-cell motility, or incorporate spatially dependent cell-to-cell interactions. Here, we present a  
22 computational model that takes into account cell interactions and describes cell migration in  
23 direct current electric field. We compare this model with *in vitro* experiments, in which human  
24 primary osteoblasts are exposed to direct current electric field of varying field strength. Our  
25 results show that cell-cell interactions and fluctuations in the migration direction together leads  
26 to anode-directed collective migration of osteoblasts.

---

## 28 Introduction

29 The response of the cell to its sensory inputs plays a crucial role in many biological processes such  
30 as embryonic development, tissue formation/regeneration and wound healing. One of the crucial  
31 common reactions of cells is their directed motility, where cells alter their motion in response to

32 external stimuli. Generally, such stimuli are considered to consist of chemical (chemotaxis) or me-  
33 chanical (adhesion and substrate contact; haptotaxis) mechanisms, as well as of temperature gra-  
34 dients (thermotaxis) or electric fields (electrotaxis) *Simpson et al. (2017)*, *Piotrowski-Daspit (2016)*  
35 *Lara Rodriguez and Schneider (2013)*, *Wu and Lin (2011)*; *Zajdel et al. (2020)*. The latter, electrotaxis,  
36 also termed galvanotaxis, is increasingly studied in particular in keratinocytes and fibroblasts, since  
37 it may provide a promising strategy to foster skin wound healing *Liang et al. (2020)*, *Cho et al. (2018)*,  
38 *Lin et al. (2017)*, *Tai et al. (2009)*, *Saltukoglu et al. (2015)*. In this context, several groups aimed to  
39 clarify the nature of the electric field sensor. One possible candidate of such a sensor is the outer,  
40 negatively charged glycocalyx, which also is responsible for adhesive behaviour *Hart and Palisano*  
41 *(2017)*. Other studies point to an important role of lipid rafts: their redistribution and clustering  
42 appear to be responsible for electrical field sensing in fibroblasts, mesenchymal stem cells, and  
43 adenocarcinoma cells *Lin et al. (2017)*, but also in corneal epithelial cells *Zhao et al. (2002)*. In most  
44 of these cells, the orientation seems to be cathodal (e.g. in fibroblasts and mesenchymal stem and  
45 corneal epithelial cells *Lin et al. (2017)* *Zhao et al. (2002)*). However, this does not apply to all cell  
46 types: adenocarcinoma cells, but also bone marrow mesenchymal stem cells, show the opposite  
47 orientation, i.e. anodal *Lin et al. (2017)*; *Zhao et al. (2011)*. Also the downstream signalling appar-  
48 ently is differential; in the various studies, Rho and PI3K *Lin et al. (2017)*, EGF and ERK1/2 *Zhao et al.*  
49 *(2002)*, or PKG, and again PI3K (this time in dictyostelium *Sato et al. (2009)*, where starvation ap-  
50 pears to initiate migratory movement *Guido et al. (2020)*) were found to be involved. Interestingly, a  
51 reversal of directionality was reported for keratinocytes when inhibiting P2Y receptors *Saltukoglu*  
52 *et al. (2015)*. We recently reported that store-operated calcium channels are pivotal for electro-  
53 taxis in human osteoblasts *Rohde et al. (2019)*, which interestingly migrate to the anode. Thus,  
54 both electrotaxis as such, as well as the polarity, seem to be dependent on a variety of factors,  
55 such as cell type, environment, possibly age and ontogenetic stage, all of which should influence  
56 signalling pathway equipment.

57 One of the factors that has not found much consideration so far: *In vivo*, electrotactic cell migra-  
58 tion involves not only singular, but many cells, for example in a tissue, which collectively respond  
59 to either endogenous or exogenous electric fields. Such an electric field-dependent collective cell  
60 migration raises the question in which way electric field on the one hand, and neighbour-cell be-  
61 haviour on the other (both close-range limited by finite volume, and intermediate governed by  
62 group orientational alignment) interact to generate a final migration vector. In previous modeling  
63 studies, mainly reaction-diffusion based models were used *Gruler and Nuccitelli (2000)*, *Schien-*  
64 *bein and Gruler (1993)*, in some cases including interaction between electrical field and chemoat-  
65 tractant *Vanegas-Acosta et al. (2012)*, *Wu and Lin (2011)*. The focus of these approaches was on  
66 cell migration mainly at the mean-field level and did not resolve the processes at the level of a sin-  
67 gle cell. Thus, cell-cell interactions as possible determining factors for cell migration direction and  
68 speed have not been modeled so far. Cell-cell communication establishes a network which gives  
69 rise to many interesting behaviours, such as non-linear collective response, as observed in quorum  
70 sensing, a type of bacterial cell-cell communication *Waters and Bassler (2005)*; *Thurley et al. (2018)*.  
71 Quantitative studies have shown that collective cell migration in epithelial structures is an emer-  
72 gent phenomenon, which cannot be explained without taking into account cell-cell interactions

73 *Barton et al. (2017); Henkes et al. (2020)*. A specific class of agent-based model that takes into  
74 account interactions between individual active particles during migration in continuous space are  
75 the self-propelled particle models, which were developed to understand flocking phenomena and  
76 show that under some conditions transitions can be observed where collective effects give rise to  
77 a common motility pattern *Bittig et al. (2010); Vicsek et al. (1995); Bhattacharya and Vicsek (2010)*.  
78 Self-propelled particle based models have been widely used to study collective behaviour in cell  
79 migration in tissues *Szabó et al. (2006); Trepap et al. (2009)*. Self-propelled voronoi model, a hybrid  
80 of self-propelled particle model and vertex model, that links active cell mechanics with cell shape  
81 and cell motility predicts a liquid-solid transition in confluent tissues, where cell-cell interactions,  
82 among others, play a key role *Bi et al. (2016), Merkel and Manning (2017); Henkes et al. (2020)*.  
83 While inclusion of cell-cell interactions in models seem to be natural in the case of high-density tis-  
84 sue culture, where cells adhere to each other and thus exert a pulling force on the neighboring cells,  
85 for examples in epithelial wound healing *Brugués et al. (2014)*, the rules governing such an interac-  
86 tion in a system of isolated cells, such as *in vitro* cell culture, remains ambiguous. To our knowledge,  
87 to date no computational model has taken into account individual cell interactions to study migra-  
88 tion of cells stimulated by external electric field. Here, we propose a novel data-driven model for  
89 collective dynamics of cells stimulated by direct current (DC) electric field. By re-analysing data on  
90 individual cell basis from our recent study on osteoblast migration mechanisms in DC electric field  
91 *Rohde et al. (2019)*, we test the hypothesis that cell-cell interactions shape the total vector.

## 92 **Results**

### 93 **In vitro DC stimulation of human osteoblasts**

94 In the experimental part of this study, we exposed human osteoblasts to DC electric fields for 7  
95 hours (h) at different stimulation strengths and matched each of these experiments with a sham-  
96 stimulated, control group treated identically, save the DC stimulation. For the analysis of the migra-  
97 tion behaviour, we selected adherent cells in the stimulation chambers which could be identified  
98 clearly at starting and end points of the experiment, and did not form clusters precluding the outlin-  
99 ing of their boundaries (Figure 1 A-C). Using photographs of several fields of vision in each chamber,  
100 1-4 cells could be traced in this way per field of vision position, totalling  $n=177$  cells (sham stimu-  
101 lation), as well as  $n=34$  cells (at 160 V/m),  $n=35$  cells (at 300 V/m),  $n=26$  (at 360 V/m),  $n=43$  (at 425  
102 V/m) and  $n=33$  (at 436 V/m). As one can notice in the original photographs of one typical cell from  
103 the experiment using 436 V/m stimulation, the cells move (in this case anodally), and at the same  
104 time change their shape within the 7 h stimulation (Figure 1 A-C). While we did not analyse shape  
105 changes any further in this study, we took them into consideration by using centroids of the cells  
106 (blue dots in Figure 1 C) as markers to determine the net movement.

107 Comparing cell migration velocities (plotted as sectors of polar plots) without stimulation (Figure  
108 1 D), to those with weak (160 V/m; Figure 1 E) or strong stimulation (436 V/m; Figure 1 F), one can  
109 appreciate that the directionality of migration shifts from random, covering all sectors of the plot  
110 (Figure 1 D) to exclusively anodal, covering only the anodal sectors (Figure 1 F), with increasing  
111 field strength. At the same time, also the speed of the cells appears to shift from lower speeds

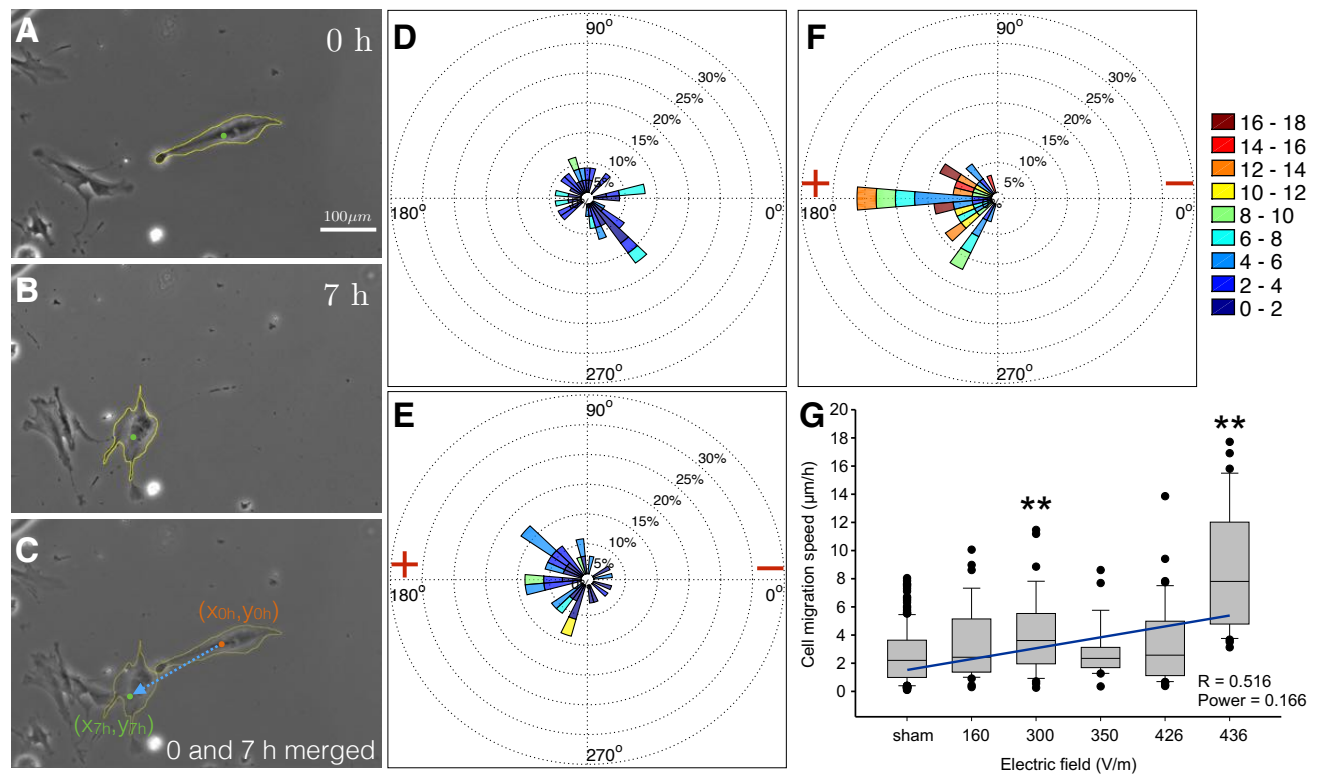

**Figure 1. Single-cell analysis of migration of osteoblasts in a DC electric field.** A-C Photomicrographs of osteoblasts in stimulating chamber. Cells boundaries were manually outlined as depicted (yellow coastline). (A) denotes the time point before stimulation. (B) shows the position of the same cells after 7h DC-stimulation (436 V/m). (C) demonstrates the overlay of A and B. Blue arrow: displacement of cell centroid. (D-F) Polar plots showing the velocity of cell migration in the cases of sham (D), 160 V/m, (E), and 436 V (F) DC stimulation. Width of sectors within these polar plots corresponds to 10° each; data of cells migrating within each 10° sector are cumulated. Speed range is color coded (in μm/h) as shown in the insets. The relative sector lengths denote the percentage of cells migrating at a certain speed range. (G) Box and whisker plot of medians (horizontal lines) of cell migration speed vs. electric field strength. Whiskers denote 25-75 percentiles of data distribution. Dots show data lying outside these percentiles. Numbers of cells for each experiment are: 177, 34, 35, 26, 43, 33 for sham, and 160, 300, 360, 426 and 436 V/m, respectively. Both at 300 V/m, and at the maximum strength of 436 V/m, the speed is significantly higher than under all other conditions ( $p < 0.001$ ; asterisks, ANOVA on ranks, all-pairwise comparisons using Dunn's test). Speed thus correlates weakly with applied electric field, showing a regression (blue line) of  $R = 0.516$ , albeit at low power of 0.166.

112 with a maximum of 8-10 μm/h (green hues in Figure 1 D corresponding to ~ 2.5 % of the cells) to a  
 113 maximum of 16-18 μm/h (red sectors in Figure 1 F corresponding to ~ 12 % of the cells).

114 To address the question of a possible correlation of speed and field strength, we quantified  
 115 the cell migration speed of all cells in all experiments under different stimulation strengths. As  
 116 shown in Figure 1 G, migration speed under DC-stimulation is significantly different from sham  
 117 stimulation conditions only at 300 V/m and 436 V/m ( $p < 0.001$ , ANOVA on ranks with Dunn's all-  
 118 pairwise comparisons). Considering all values and calculating a linear regression (blue line in Figure  
 119 1 G), there is thus a weak correlation between field strength and migration speed, with a regression  
 120 coefficient of  $R = 0.516$ .

## 121 **Modeling electrotactic collective osteoblast cell migration**

122 We describe the *in vitro* motility behaviour of individual cells that are subject to external DC electric  
 123 field. The main components of our model are (i) the ability of the cells to interact with the other  
 124 cells, and, (ii) the ability of the cells to interact with the external electric field. The cell-cell interac-  
 125 tion involves two types of forces: short-range repulsive forces, and the alignment of the direction  
 126 of motion with the cells' local neighbours. The force at the short distances, through soft-core re-  
 127 pulsion, ensures that cells do not overlap. We also include in our model the influence of each cell's  
 128 local neighbours on the direction of its migration. Such cell-to-cell interactions are certainly playing  
 129 a role in high-density tissue culture via cell-cell contacts. However, since mechanical or signalling  
 130 cues are at least conceivable also in 2D cell cultures without direct cell contacts, we introduce this  
 131 factor in the model to study the possible role of such interactions in our experiments. Finally, we  
 132 also consider the interaction of cells with the applied DC electric field.

### 133 The cell

134 Each cell is modeled as a circular disk of radius  $R$  which can migrate in two spatial dimensions with  
 135 an active speed of  $v_0$ . The state of each cell  $i$  is characterised at time  $t$  by its position  $\mathbf{r}_i^t$ , described  
 136 through the coordinates  $(x_i^t, y_i^t)$ , and its migration velocity  $\mathbf{v}_i^t = v_0 \mathbf{s}_i^t$ , where,  $v_0$  is the cell migration  
 137 speed and  $\mathbf{s}_i^t = (\cos \theta_i^t, \sin \theta_i^t)$  is the unit vector representing the direction of migration, with  $\theta$  being  
 138 the angle that the cell makes with the horizontal axis of the laboratory frame. The direction  $\theta$   
 139 that each cell takes at any consecutive time depends not only on its direction of motion in the  
 140 immediately preceding time, but also on the forces acting on the cell. The total force acting on the  
 141 cell  $i$  results from cell-cell interactions and cell interaction with the applied DC electric field, These  
 142 forces are discussed in more detail in the following sections.

### 143 Cell-cell interactions

144 We consider two types of cell-cell interactions in our model. The cell-cell interaction due to finite-  
 145 volume exclusion and the cell-cell interaction resulting from cell orientational alignment with its  
 146 neighbours. Each cell is assumed to occupy a finite area in the cell culture medium in which it is  
 147 placed. To avoid cell overlaps, we include repulsive force  $\mathbf{K}_{ij}$  that is proportional to the degree of  
 148 overlap between two cells and is given by,

$$\mathbf{K}_{ij} = k(2R - r_{ij})\hat{\mathbf{r}}_{ij} \quad (1)$$

149 with,  $\mathbf{r}_{ij} = \mathbf{r}_i - \mathbf{r}_j = \hat{\mathbf{r}}_{ij} r_{ij}$  and  $k$  a force constant.  $r_{ij}$  is the euclidean distance between two cells  $i$   
 150 and  $j$  and is calculated as  $\sqrt{(x_i - x_j)^2 + (y_i - y_j)^2}$ . The total repulsive force acting on cell  $i$  at time  $t$ ,  
 151 denoted by  $\mathbf{F}_i^t$  is,

$$\mathbf{F}_i^t = \sum_{|\mathbf{r}_i^t - \mathbf{r}_j^t| < 2R} \mathbf{K}_{ij}. \quad (2)$$

152 The directional alignment of cells with its proximal neighbours is given by,

$$\theta_i^t = \text{Arg} \left[ \sum_{|\mathbf{r}_i^t - \mathbf{r}_j^t| < r_a} \mathbf{s}_j^t \right] + \eta \xi_i^t \quad (3)$$

153 and is only hampered by an angular white noise uniformly distributed in  $[-\pi, \pi]$  with  $\langle \xi_i^t \rangle = 0$  and  
 154  $\langle \xi_i^t \xi_j^t \rangle \sim \delta_{ij} \delta_{tt'}$  and whose strength is given by  $\eta$ . The function  $\text{Arg}$  in Equation 3 returns the angle

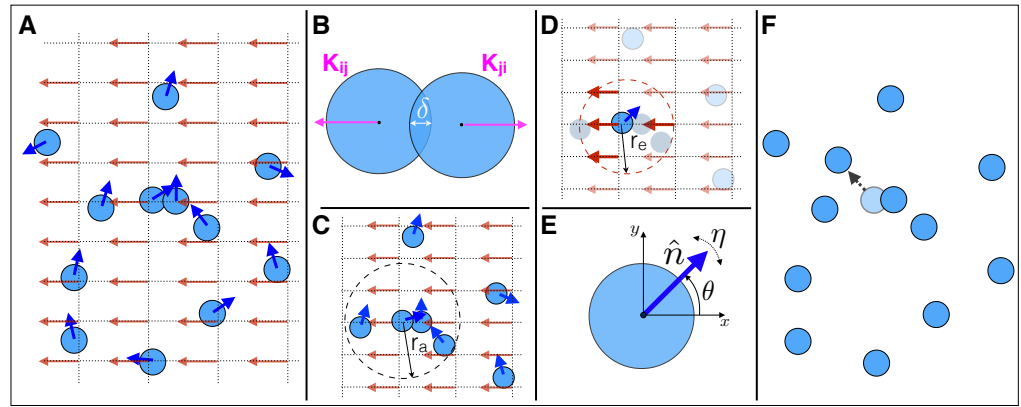

**Figure 2. Theoretical model for cell migration in a DC electric field.** (A) Osteoblasts in the cell culture chamber exposed to the DC electric field, are modelled as active particles (light blue colored disks) of radius  $R$  and velocity  $v_i$  ( $i$  is the index of the cell). The dark blue colored arrows laid over the circular disks are the cell velocity unit vectors  $\hat{n}$ . The model takes into account both cell-cell and cell-electric field interactions. These interactions can influence the cell velocity. Cell-cell interactions involve finite-volume exclusion and migration orientation alignment. (B) When two cells overlap, each cell  $i$  experiences a displacing force  $K_{ij}$  from its neighboring cell  $j$ , where  $i$  and  $j$  are the cell indices. The magnitude of such a force is linearly proportional to the degree of overlap  $\delta$ . The total force experienced by the cell from all its overlapping (C) The migration direction of a cell can be influenced by its neighbouring cells located within the radius  $r_a$ , taken from the cell's center. Such an interaction re-orientates the migration direction of a cell to the average direction of migration of neighbouring cells. (D) Each individual cell also experiences the force due to the electric field. The electric field is defined on discrete grid points in the two-dimensional space in which the cells move. A cell experiences the average force from the electric field at all the grid points that lie within the radius  $r_e$ , also taken from the cell's center. The net angle  $\theta$  of cells alignment results from the cumulative effect of the cellular interactions described in (B-D). (E) The limited precision in cellular sensing of directional alignment is captured by an angular white noise term whose strength is given by  $\eta$ . (F) As a result of these interactions, the model at each time step calculates and updates the position of each cell (shown by dotted arrow for the cell under consideration) for the next time step.

155 defining the orientation of the average vector  $\sum_{|r_i^t - r_j^t| < r_a} s_j^t$ , where the sum extends only to those  
 156 cells which are within the interaction radius  $r_a$  of cell  $i$ .

### 157 Cell-electric field interaction

158 The electric field is defined on a regular square lattice underlying the domain in which the cells  
 159 are migrating. Each grid point is specified by coordinates  $(p, q)$ . The electric field at the grid point  
 160 located at  $(p_k, q_k)$  is characterised by the unit vector  $\mathbf{d}_k = (\cos \Theta_k, \sin \Theta_k)$  and the electric field ampli-  
 161 tude  $E_0$ , which corresponds to the electric field strength of experimental electrical stimulations.  $\Theta_k$   
 162 is the angle that the electric field vector at  $(p_k, q_k)$  makes with the horizontal. Cell  $i$  experiences an  
 163 effective electric field which is the average of the electric field on all the grid points that lie in the  
 164 region within the radius  $r_e$  of cell  $i$ . The net electrical force experienced by cell  $i$  is proportional to  
 165 the net electric field strength and is given by,

$$\mathbf{D}_i^t = E_i^{\text{net}} (\cos \Theta_i^{\text{net}}, \sin \Theta_i^{\text{net}}) \quad (4)$$

166 where,  $\Theta_i^{\text{net}}$  and  $E_i^{\text{net}}$  are the mean orientation and the mean strength of the electric field  $\mathbf{E}_i^{\text{net}}$  sensed  
 167 by the cell at the location  $(x_i, y_i)$ .

**Table 1.** List of all the model parameters, their notation, description and value (dimensionless).

| Parameter | Description                                               | Value |
|-----------|-----------------------------------------------------------|-------|
| $R$       | cell radius                                               | 1     |
| $v_0$     | active cell speed                                         | 1     |
| $k$       | repulsive force constant                                  | 1     |
| $\nu$     | friction factor                                           | 0.1   |
| $\eta$    | noise strength                                            | 0.05  |
| $r_a$     | distance over which orientation alignment occurs          | 2     |
| $r_e$     | distance up to which electric field is sensed by the cell | 2     |
| $\mu$     | electrical mobility of cell                               | 0.04  |

168 After calculating all the interactions, including the cell neighbor orientation alignment, the po-  
 169 sition of each cell is updated at the end of each time step by the following scheme:

$$\mathbf{r}_i^{t+1} = \mathbf{r}_i^t + \nu(\mathbf{v}_i^t + \mathbf{F}_i^t + \mu\mathbf{D}_i^t) \quad (5)$$

170 where,  $\nu$  is a friction factor that is associated with the cell substrate interaction and  $\mu$  is the cell  
 171 mobility in the presence of external electric field.

#### 172 Simulation details

173 We simulate the motility behaviour of  $N = 35$  cells, since in our experiments there are approxi-  
 174 mately 30-40 cells in a single field of view. Cells are initially randomly distributed in a circular region  
 175 within the spatial domain representing the stimulation chamber. In our simulations we also study  
 176 the effects of higher initial cell densities on cell migration in DC electric field. Osteoblast cells are  
 177 roughly  $100 \mu\text{m}$  in diameter considering all cells extensions, and we use this to define the cell radius  
 178  $R$ , which is one length unit in our simulations. The cell radius  $R$  is assumed to be the basic length  
 179 scale in these simulations. The active speed of cells is  $0.1R$  per time step. Time steps are separated  
 180 by  $\Delta t$  which is set to 1. The time parameters in the simulations are scaled such that the speed of  
 181 cells in the case of no electric field corresponds to the average speed of cells in the experimental  
 182 case of unstimulated sham, which is  $\sim 3 \mu\text{m}/\text{h}$ . At the start of each simulation, we specify the initial  
 183 positions  $x_i^0, y_i^0$  of each cell  $i$  and assign their initial speed  $v_i^0$  as well as the orientation  $\theta_i$ , which is  
 184 distributed randomly in the range  $[0, 2\pi]$ . At each time step for each cell we identify cells which are  
 185 less than a distance of  $2R$  apart. From this we calculate the force due to volume exclusion acting  
 186 on each cell from its neighboring cells, as given by Equation 1 and 2. We also determine all the grid  
 187 points of the underlying grid, on which the electric field is defined, that are within the radius of  $r_e$   
 188 of each cell and calculate the mean electric field. This constitutes the net force due to the electric  
 189 field  $\mathbf{D}_i$  acting on each cell  $i$ , as given by Equation 4. Experiments show that the cell migration is  
 190 anode-directed. We incorporate this into our model by assigning a polarity to the mean electrical  
 191 force, experienced by the cell, that is opposite to the applied electric field, i.e  $\mathbf{D}_i = -\mathbf{E}_i^{net}$ . In addi-  
 192 tion, we also determine for each cell all its neighboring cells that are located within the radius  $r_a$ ,  
 193 and calculate the mean orientation of all those cells. Each cells' orientation is updated by its mean

194 orientation, to which a weak noise  $\eta = 0.05$  is added, as given by Equation 3. Finally, the positions  
195 of each individual cell is then updated using the Equation 5.

#### 196 Migratory behaviour of osteoblasts in DC electrical field

197 To study the influence of externally applied DC electrical field on the migratory behaviour of hu-  
198 man osteoblast we simulated  $N=35$  migrating cells with and without DC electrical stimulation for  
199 130 time steps. The parameters of the model and their values used in these simulations are listed  
200 in Table 1. Due to random initial conditions and stochastic angular fluctuations in the simulations,  
201 we have verified through multiple runs of the simulations that our results are qualitatively invariant,  
202 Figure 3–Figure supplement 1. We use periodic boundary conditions, to reflect the experimental  
203 conditions in which cells are placed in the center, and thus far from the boundaries, of the stimu-  
204 lation chamber. Figure 3 left column shows the positions of all cells at the final time step, in the  
205 case of no electrical stimulation, Figure 3 A, and in the case of DC electrical stimulation with field  
206 amplitudes of 0.36 and 1, Figure 3 B and C, respectively. Electric field amplitude of magnitude 1  
207 in simulations corresponds to the maximum field strength of electrical stimulation in experiments,  
208 i.e., 436 V/m, Figure 1 G. Figure 3 D-F (upper row) shows the individual cell trajectories at each time  
209 step in the case of no electrical stimulation, Figure 3 D, and in the case of electrical stimulation with  
210 different field amplitudes of 0.36 and 1, Figure 3 E and F, respectively. The velocity of cell migra-  
211 tion, calculated from the initial and the final time step, is shown in Figure 3 G-I as polar plots for  
212 the case without electrical stimulation, Figure 3 G, and with electrical stimulation of different field  
213 amplitudes, i.e. 0.36 and 1, Figure 3 H and I, respectively. Each polar plot shown in Figure 3 G-I, is  
214 the cumulate of 10 separate runs of the simulation. Initial velocity of each cell and the noise in cell  
215 velocity at each time step are random, this renders robustness to the polar plot distributions.

216 In the absence of electrical stimulation the cells move, as expected, in all directions, Figure 3 A.  
217 Trajectories of individual cells show that, over time, all cells collectively explore the space homo-  
218 geneously, Figure 3 B, a feature which is also reflected in the polar plots, which are constructed,  
219 similar to the experiments, based only on the initial and final time steps Figure 3 G. The mean cell  
220 speed in this case is  $\sim 3\mu\text{m/h}$ . However, when DC electrical field of amplitude 0.36, which corre-  
221 sponds to 160 V/m, is applied, cells start exhibiting a directional migration towards the anode 3 B.  
222 Individual cell trajectory plot shows that although the final position of the majority of the cells is  
223 towards the anode, few cells still migrate towards the cathode, albeit much shorter distances than  
224 the anodally migrated cells, 3 E. The polar plot, showing velocity of cell migration, clearly shows the  
225 modulation of the orientation of migration by external field, 3 H. Following the trajectories of indi-  
226 vidual cells also shows that cell migration is not instantaneously switched in the direction of anode.  
227 Cells respond to the applied electrical field by gradually changing their directionality of migration.  
228 Initially most of the cells move orthogonal to the applied field and then, at later times, gradually  
229 turn towards the anode. This delayed response in eventual anode directed motility of cells is be-  
230 cause the force due to the electric field  $\mu E_0$  is much weaker than the active cell migration speed  
231  $v_0$ . When the strength of the electric field  $E_0$  is increased to 1, the directionality of cell migration  
232 shows a stronger re-orientation towards the anode, 3 C. Cell migration in this case shows a much  
233 faster re-orientation and much persistent motion towards anode 3 (F). Figure 3 I shows that not



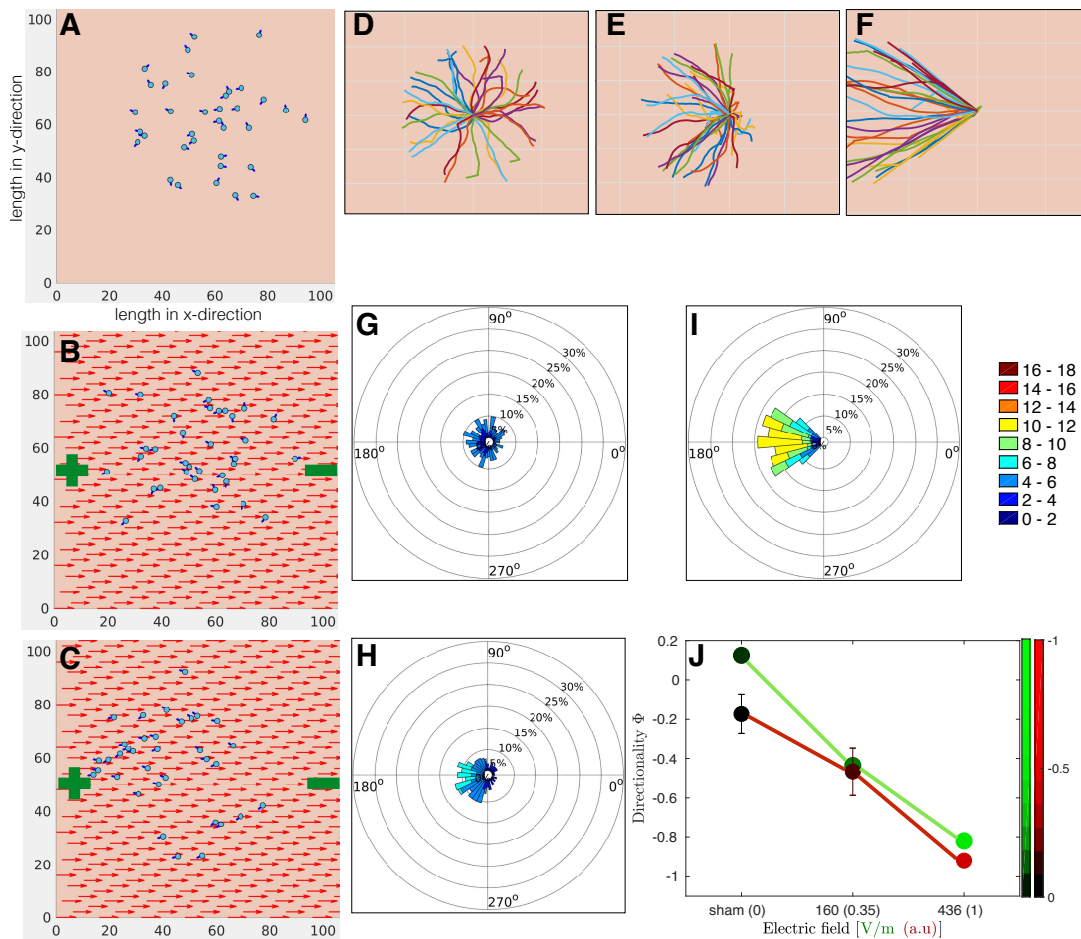

**Figure 3. Simulation of cell migration model in DC electrical field.** Each simulation consists of 35 cells initially randomly distributed in a circular region around the center of the domain of size  $120 \times 120$ . Osteoblasts are modelled as light blue colored circular disks of radius  $R=1$  and randomly oriented initial migration velocity, shown by dark blue arrows. The cells have an active speed that propels them a distance of  $0.1R$  per unit time. In these simulations,  $r_a = 2$ , which results in a situation where direct cell contact not only leads to repulsion forces due to volume exclusion, but also an alignment force leading to common reorientation of the movement direction of the individual cells. In addition, the noise strength  $\eta = 0.05$ , results in directionality fluctuations in the range  $[-8^\circ, 8^\circ]$ . The model is simulated for 130 time steps. **(A-C)** Final positions of individual cells in the case of no DC electric field **(A)**, with DC electric field of strength 0.36 **(B)** and 1 **(C)**, respectively. Electric field strength of 1 in simulations corresponds to the maximum electric field strength of 436 V/m in experiments. The polarity of the DC electric field is shown by green colored plus and minus symbols in **(B)** and **(C)**. **(D-F)** Trajectories of individual cells corresponding to the three cases shown in **(A-C)**, respectively. Cell positions are adjusted such that all the trajectories originate from  $x = 0$  and  $y = 0$  at  $t = 0$ . **(G-I)** Polar plots showing the velocity of cell migration taking into account only the initial and the final time step, corresponding to the three cases shown in **(A-C)**, respectively. Each polar plot is a cumulate of data from 10 separate simulation runs, where each simulation consists of 35 cells. Simulation cell speed in the case of no electrical stimulation are scaled to the mean cell speed of experimental sham, i.e.  $\sim 3 \mu\text{m/h}$ . This constant rescaling factor is then multiplied to individual cell velocities from simulation in electrical stimulation cases. **(J)** Directionality order parameter  $\Phi$  obtained from simulations (dots in shades of red connected by red lines) and experiments (dots in shades of green connected by green lines) corresponding to the three different cases shown in **(A-C)**. The electric field strength in simulations is shown in arbitrary units (a.u.), where 1 (in brackets) corresponds to maximum strength of 436 V/m in experiments. Different shades of the two colors (red and green) correspond to the magnitude of the directionality as shown in their respective colorbar. Each value of directionality obtained from simulations is the average of 10 separate simulation runs, where each simulation consists of 35 cells. Error bars in simulation data show the standard deviation in  $\Phi$ .

**Figure 3-Figure supplement 1.** Individual cell trajectories for multiple simulation runs.

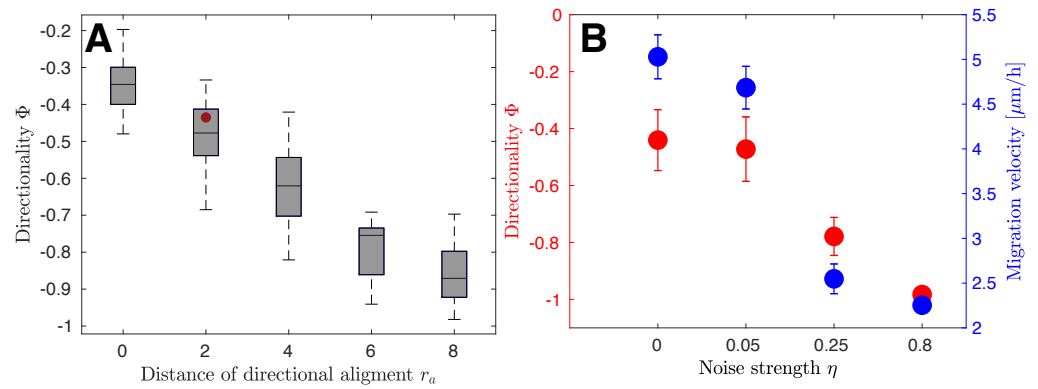

**Figure 4. Influence of directional alignment and noise strength on cell migration.** Parameter sweep was performed to study the influence of directional alignment and noise strength on the directionality of migration in the case of electrical stimulation of strength 0.35, which corresponds to 160 V/m in experiments. Each simulation data point is an average of 10 independent simulation runs. **(A)** Box and whisker plot of medians (horizontal lines) of directionality of migration  $\Phi$  vs. distance of directional alignment  $r_a$ . The values of all other parameters, except  $r_a$ , are as mentioned in Table 1. Cells show higher directedness  $\Phi$  in their migration towards anode with increasing distance  $r_a$  over which directional alignment occurs. The red dot is the experimental value for the directionality in the case of electrical stimulation of strength 160 V/m. Whiskers denote 25-75 percentiles of data distribution. ( $p < 0.001$ ; statistical significance was estimated by performing one-way ANOVA analysis using MATLAB 2018b, The MathWorks, Natick, 2018).  $\Phi = -1$  corresponds to fully directed movement towards the anode, which is located at  $180^\circ$  in Figure 1 D-F and Figure 3 G-I. **(B)** Directionality order parameter  $\Phi$  (red) and migration velocity (blue) vs. noise strength  $\eta$ . The values of all other parameters, except  $\eta$ , are as mentioned in Table 1. Increasing noise strength leads to higher directedness in cell movement towards the anode  $\Phi \sim -1$ . However, for the same values of noise strength, migration velocity decreases with increasing noise strength. Error bars show the standard deviation in the directionality and the migration velocity for different values of noise strength obtained from simulations.

234 only the direction of the motion is influenced by increasing field strength, but also the velocity of  
 235 the cell migration. The maximum cell speed in this case even reaches up to 10-12  $\mu\text{m/h}$ , Figure  
 236 3 I. To better quantify the changes in the collective cell migratory behaviour we calculate, in both  
 237 experiments and simulations, the directionality order parameter  $\Phi$ , which reflects how well cell  
 238 movements have aligned with the electric field and directed towards the anode, and is given by,

$$\Phi = \frac{1}{N} \sum_i \cos(\theta_i) \quad (6)$$

239 where,  $N$  is the total number of cells and the sum is over the cosine of migration direction of  
 240 individual cells  $\theta_i$ .  $\Phi$  can vary between 1 (towards cathode) and -1 (towards anode) and  $\Phi \simeq 0$   
 241 corresponds to random cell movement. Our results show that for the listed choice of parameters,  
 242 the directionality order parameter  $\Phi$  obtained from the model simulation matches very closely  
 243 with the experiments, Figure 3 J.

244 Our results shown in Figure 3 reproduce the following experimental observations (i) in the ab-  
 245 sence of electrical stimulation, which corresponds to the experimental sham case, directional mi-  
 246 gration of cells is not observed and cells collectively move in all directions, (ii) alignment of the  
 247 directionality of cell migration depends on the strength of the applied electrical field, (iii) average  
 248 cell velocity increases with the field strength.

## 249 Influence of direction alignment and noise on cell migration

250 In our model the collective behaviour results from the directional alignment of individual cells with  
251 each other. This is controlled by the model parameter  $r_a$ , which is the distance over which the cell  
252 aligns its direction of migration with its neighbors, and  $\eta$ , which is the strength of the fluctuation  
253 in the direction of migration of individual cell. In the simulation results discussed in the preceding  
254 section, Figure 3, we considered  $r_a = 2R$ , i.e the orientation alignment occurs only when cells touch  
255 each other. In order to understand how the two model parameters  $r_a$  and  $\eta$  affect the migratory  
256 behaviour of electrically stimulated osteoblast cells, we perform a parameter sweep study of cell  
257 migration with fixed electrical stimulation of strength 0.36 (which corresponds to 160 V/m in ex-  
258 periments) and different values of  $r_a$  and  $\eta$  as shown in Figure 4A and B. The values of all the other  
259 parameters are as mentioned in Table 1. Our results show that, even in the case of weak electrical  
260 stimulation, which corresponds to 160 V/m in experiments, with increasing  $r_a$  the cells move in a  
261 more directed manner towards the anode, i.e  $\Phi$  approaches the value of  $-1$  Figure 4A. Cell move-  
262 ment also shows higher directedness with increasing noise strength  $\eta$ , which is unexpected, Figure  
263 4B. On the contrary, the cell migration velocity decreases with increasing noise strength, Figure  
264 4B. Taken together these results suggest that the parameters  $r_a$  and  $\eta$  can significantly alter the  
265 dynamics of cell migration and give rise to collective electrotactic motion of osteoblast cells.

## 266 Discussion

267 The migration of osteoblasts, which plays a key role in bone regeneration, can be modulated by  
268 external electrical stimulation *Ferrier et al. (1986)*. This offers an attractive approach towards build-  
269 ing electrically active implants for effective tissue regeneration *Hiemer et al. (2016); Kaivosoja et al.*  
270 *(2015); Brighton et al. (1985)*. In the present paper, we presented a computational model to study  
271 (i) the migratory behaviour of osteoblasts, and, (ii) the consequences of the application of external  
272 electrical field on their migration. The model was used to study the collective behaviour of many  
273 cells in *in vitro* experiments where primary human osteoblasts placed in electrotaxis chamber were  
274 stimulated by DC electric field. For this purpose, we re-analysed the galvanotactic migration of  
275 human osteoblasts exposed to DC-electric field stimulation at different field strengths from a pre-  
276 vious study published in *Rohde et al. (2019)*, now using single-cell rather than clustered data. As  
277 observed in our previous paper *Rohde et al. (2019)*, we confirmed that field exposition leads to  
278 migratory directionality towards the anode, and elucidate that the migratory speed distribution  
279 ranges from 2-18  $\mu\text{m/h}$ , with significantly higher speeds of migration than unstimulated cells at  
280 DC-field strengths of 300 and 436 V/m. Using this single-cell analysis approach, beyond our initial  
281 findings in the cited paper using pooled data (i.e. stimulated vs. unstimulated only), we show that  
282 the directionality thus actually significantly depends on the field strength, with random migration  
283 without stimulation,  $\sim 65\%$  anodal migration at low (160 V/m) and exclusively anodal migration  
284 at highest field strength (436 V/m). Our detailed cell-by-cell analysis also shows that, al-  
285 though directionality of cell migration clearly correlates with the strength of the applied electric  
286 field, there is only a weak correlation of migratory speed and electric field strength, a correlation  
287 which could not be seen in the pooled analysis of our previous paper.

288 To explain these experimental observations, we modeled each cell as an active agent whose  
289 movement is influenced by its own interactions with other cells, external electric field and stochas-  
290 tic switching in the direction of migration. The model takes into account the force experienced  
291 by the cell due to the applied DC electric field. We also considered two types of inter-cellular in-  
292 teractions: in addition to the nearest neighbor interaction that ensures finite-volume exclusion  
293 by penalizing cell overlaps, cells also interact with other cells via a velocity alignment mechanism.  
294 Although specific molecular mechanisms underlying these interactions remain unclear, two im-  
295 portant questions can be addressed by the current simulation study: (i) Does directionality also  
296 depend on interaction among neighbouring migrating cells, and if so, how large is this interaction  
297 radius, (ii) Do directionality and migration speed depend on the accuracy of the putative cellular  
298 field sensing mechanism, i.e. in which way does a noise factor influence migration directionality  
299 and migration speed?

300 Our results show that the motility behaviour of cells is influenced by the distance over which  
301 the cell aligns with its neighbors, stochastic switching in the direction of migration and the strength  
302 of applied electric field. The simulations in the present paper closely match the experimentally ob-  
303 served weak correlation between migration speed and the applied electric field, and are more re-  
304 alistic than previously published ones *Vanegas-Acosta et al. (2012)*, which predicted speed ranges  
305 from 1.8 to 4.0  $\mu\text{m/s}$ , i.e. nearly tenfold the maximum observed by us. As discussed previously,  
306 migration at such high speeds probably finds its limitations in adhesive forces acting on the cells  
307 on the one hand, and rate-limiting factors such as actin conformational change being limited by  
308 temperature and  $\text{Ca}^{2+}$  dynamics *Jacobs et al. (2011)*; *Sich et al. (2010)*. We performed a quantitative  
309 comparison of the directionality order parameter obtained from simulations with experiments as  
310 shown in Figure 3(J), where directionality angles  $\Phi$  of experimental values and simulations practi-  
311 cally overlap. As the simulation results show, varying  $r_a$  from 0 (i.e. the case with no inter-cellular  
312 interactions) to 8 (i.e. the case with inter-cellular interactions between two cells extending to dis-  
313 tances of four cell diameters), the directionality of  $\sim -0.45$  for electrical stimulation of strength  
314 160V/m, as found in our experiments, best matches with a value of  $r_a$  of 2. These results suggest  
315 that the interactions between cells only in direct contact likely lead to parallel anodal movement.  
316 The mechanism of this interaction could be speculated to rely on e.g. osteoblast binding via cad-  
317 herin, an interaction known to be important for morphogenesis of osteoblasts, and subsequent  
318 modulation of actin function *Stains and Civitelli (2005)*; *Stains et al. (2019)*. Long-distance effects,  
319 mediated by e.g. molecules secreted from the cells, tension changes within the collagen coating,  
320 or distortion of the electric field by the neighbouring cell are, in turn, unlikely to be important for  
321 osteoblasts.

322 Our results also show that stochastic orientational switching can significantly alter cellular elec-  
323 trotactic motility behaviour. In this case, a perfectly directed motion towards the anode is achieved  
324 for very high fluctuation strengths, which appears to be counter-intuitive since one would expect  
325 that for higher angular fluctuations the accuracy of directional movement aligned with the elec-  
326 tric field decreases. Varying  $\eta$  in our simulations from 0 to 0.8, the directionality of  $\sim -0.45$  in our  
327 experiments is in line only with a very low degree of noise (around 0.05, which corresponds to  
328 fluctuations of  $\sim 10^\circ$  in the direction of cell migration), but not commensurate with values of  $> 0.25$ .

329 The experimental migration speed found to be in the range of 2 to 12  $\mu\text{m}/\text{h}$  would also cover the  
330 simulated value of  $\sim 4.75 \mu\text{m}/\text{h}$  at  $\eta = 0.05$ . It is, however, conceivable, that other cell types do show  
331 more influence of noise (arguably reflecting e.g. less mechanical interactions with the substrate,  
332 varying cell shape influences, or different field sensing or signalling mechanisms). What remains  
333 to be explained is the seemingly paradoxical result that higher fluctuation levels should lead to  
334 higher accuracy in directionality. Our hypothesis would be that higher fluctuation actually raises  
335 the probability of cell-to-cell interactions, which in turn will lead to common field alignment. If this  
336 hypothesis holds true, such movement would lead to field orientation of cells with higher accuracy  
337 but lower speed due to frequent corrective movements. Although experiments clearly are needed  
338 to validate this hypothesis, it is interesting to note that at the highest stimulation strength of 436  
339 V/m, those cells which are best aligned to the field and directed towards anode do not belong  
340 to the fastest subset of cells (which are, indeed,  $10^\circ$ - $30^\circ$  off the "ideal" orientation; see Figure 1  
341 F). Interestingly, in a different biological system, such noise-induced collective migration has been  
342 observed in fish schooling *Jhavar et al. (2020)*.

343 Our data-driven model presented provides a framework for studying cell migration and eluci-  
344 dating the rules and the role of individual cell interactions, with other cells and with their physical  
345 environment. This model may also be relevant to study the influence of cell density and other  
346 modes of electrical stimulation, such as alternating current stimulation on cell migration. Our ap-  
347 proach could serve as a tool to not only test existing hypotheses of electrotactic cell migration but  
348 also predict migratory behaviour under perturbation conditions.

## 349 **Methods and Materials**

### 350 **Experimental Methods**

351 In this study, data on cell migration of human osteoblasts under DC-electrical stimulation were re-  
352 analysed using a previous set of experiments *Rohde et al. (2019)*. Cell cultivation and stimulation  
353 methods are detailed in this paper, and given in brief below:

### 354 **Cell culture**

355 Human osteoblasts were isolated from femoral heads of patients ( $n = 14$ ) undergoing a total hip  
356 replacement. Patients gave consent and the study was approved by the local ethics committee (per-  
357 mit A 2010-10). Osteoblasts were isolated from cancellous bone as previously described *Lochner*  
358 *et al. (2011)*. Isolated cells were cultured in Dulbecco's Modified Eagle Medium (Pan Biotech, Aiden-  
359 bach, Germany) supplemented with 10% fetal calf serum, 1% amphotericin B, 1% penicillin-strepto-  
360 mycin and 1% hepes- buffer under standard cell culture conditions (5%  $\text{CO}_2$  and  $37^\circ\text{C}$ ). Ascor-  
361 bic acid ( $50 \mu\text{g}/\text{ml}$ ),  $\beta$ -glycerophosphate (10 mM), and dexamethasone (100nM) (Sigma Aldrich, St.  
362 Louis, MO, US) were added to cell culture medium to maintain osteoblast phenotype. For cell mi-  
363 gration experiments cells in passage three were used.

### 364 **DC electrical stimulation chamber and experimental procedure**

365 To study migration of osteoblasts in electric fields, we used a two-part stimulation chamber de-  
366 scribed in *Rohde et al. (2019)*. Before each use, both chamber parts were cleaned with 70% ethanol,

367 washed with a mild detergent and rinsed extensively with distilled water before steam steriliza-  
368 tion. Coverslips (24 × 50 mm) for seeding osteoblast cultures were coated with rat tail collagen  
369 (Advanced Biomatrix, San Diego, CA, USA) by incubation of 50 μm/ml rat tail collagen diluted in  
370 sterile 0.1% acetic acid for 1 h. Coverslips were positioned in a groove in the upper chamber part  
371 and edges sealed with silicon paste (Korasilone, Obermeier GmbH, Bad Berleburg, Germany). Up-  
372 per and lower chamber parts were bolted by 12 screws to ensure tight contact and prevent leak-  
373 age and chambers were exposed to UV light for sterilization. After this sterilisation treatment,  
374 remaining solution was aspirated and coverslips were washed twice with phosphate buffered saline  
375 (Biochrom, Berlin, Germany) before cell seeding. A total of  $2 \times 10^3$  osteoblasts were seeded per  
376 chamber and cells were allowed to adhere for 30min. Afterwards, coverslips were washed twice  
377 with medium to remove non-adherent cells. Chambers were then sealed with a top coverglass, and  
378 silicon paste and cells accommodated to chamber overnight. For DC-stimulation, silver/silver chlo-  
379 ride electrodes were placed into outer reservoirs separated from cell area to avoid electrochem-  
380 ical reactions within the tissue chamber. Current was conducted to the cell chamber using agar  
381 bridges (silicon tubes, length 120mm, inner diameter 5 mm) consisting of 2% agarose (TopVision  
382 agarose, ThermoScientific, Waltham, MA, US) in Ringer's solution (Braun, Melsungen, Germany).  
383 Current was applied to electrodes for 7 h via crocodile clamps using a DC power supply (Standard  
384 Power Pack P25, Biometra, Göttingen, Germany). To maintain constant stimulation, voltage was  
385 measured directly at the borders of the cell area (electrode distance 24 mm) using a multimeter  
386 (Votcraft VC220, Conrad Electronic, Wollerau, Switzerland) and adjusted during the experiments.  
387 Each of the experiments was conducted with one cell culture being divided to obtain sham stimu-  
388 lation group as control, and a DC-stimulation group for the respective field strength used. Electric  
389 field strengths were 160, 300, 360, 426 and 436 V/m.

### 390 Migration analysis

391 For the analysis, all cells from the sham groups were pooled as one control. Thus, a total of  $n=177$   
392 (sham), 34 (160 V/m), 35 (300 V/m), 26 (360 V/m), 43 (426 V/m) and 33 (436 V/m) cells were anal-  
393 ysed. For this, photographs were taken at 8 fields of view evenly distributed over the cell area at  
394 beginning (Figure 1A) and end time points (Figure 1B) with a Leica DMI 6000 and LAS X software dur-  
395 ing the 7-hour stimulation, or sham stimulation, procedure. The pairs of photographs were then  
396 aligned manually, and merged, taking external markers as reference points (Figure 1C). To quantify  
397 migration within the electric field, segmentation of the cell shape, including cell extensions, was per-  
398 formed manually using Image J software (NIH) for each cell that could be identified in both the time  
399 points (see yellow coastlines in Figure 1C), i.e 0 hours and 7 hours after DC stimulation. Using the  
400 coordinates of the cell centroid at these two time points, the distance and orientation of migration  
401 was calculated for each cell. The migration distance was defined as  $d = \sqrt{(X1 - X2)^2 + (Y1 - Y2)^2}$ ,  
402 where  $X1, Y1$  and  $X2, Y2$  represent the coordinates of the cell centroid at 0 hours and 7 hours af-  
403 ter DC stimulation, respectively (Figure 1C). The migration angle was defined as  $\tan^{-1}(\frac{Y2-Y1}{X2-X1})$ . Using  
404 the migration distance and orientation, we obtained a migration plot for each, which could be de-  
405 picted in a polar coordinate system, as shown in Figure 1 (D-F). The anode in the polar plots of DC  
406 stimulated experiments is located at 180° angle, Figure 1 (E,F). For better comparison of all experi-

407 ments, we binned the migration angles in 36 sectors of  $10^\circ$  each, and classified migration speeds in  
408 a scoring system. Thus, the migration angle was calculated starting from the original cell position,  
409 and angles were assigned to the 36 sectors, where sector 10-18 ( $90^\circ$ - $180^\circ$ ) and 18-26 ( $180^\circ$ - $270^\circ$ )  
410 represent anode-directed migration, while sectors 1-9 and 27-36 ( $0^\circ$ - $90^\circ$  and  $270^\circ$  to  $360^\circ$ ) represent  
411 cathode-directed cell migration. To construct polar plots (Figure 1 D-E) illustrating both migration  
412 direction and velocity, the migration speed of single cells was colour coded from 0 to  $18 \mu\text{m}/\text{h}$  in  
413 9 groups of  $3 \mu\text{m}/\text{h}$  bins. The relative sector lengths denote the percentage of cells migrating at a  
414 certain speed range.

## 415 Acknowledgments

416 This study was funded by CRC 1270 ELAINE, projects C03, C02 and A02 (RK, RB and UvR). We thank  
417 Ms. Doris Hansmann for providing the primary human osteoblasts.

## 418 References

- 419 **Barton DL**, Henkes S, Weijer CJ, Sknepnek R. Active Vertex Model for cell-resolution description of epithelial  
420 tissue mechanics. *PLoS Computational Biology*. 2017; doi: [10.1371/journal.pcbi.1005569](https://doi.org/10.1371/journal.pcbi.1005569).
- 421 **Bhattacharya K**, Vicsek T. Collective decision making in cohesive flocks. *New Journal of Physics*. 2010; doi:  
422 [10.1088/1367-2630/12/9/093019](https://doi.org/10.1088/1367-2630/12/9/093019).
- 423 **Bi D**, Yang X, Marchetti MC, Manning ML. Motility-driven glass and jamming transitions in biological tissues.  
424 *Physical Review X*. 2016; doi: [10.1103/PhysRevX.6.021011](https://doi.org/10.1103/PhysRevX.6.021011).
- 425 **Bittig AT**, Jeschke M, Uhrmacher AM. Towards modelling and simulation of crowded environments in cell  
426 biology. In: *AIP Conference Proceedings*; 2010. doi: [10.1063/1.3497964](https://doi.org/10.1063/1.3497964).
- 427 **Brighton CT**, Hozack WJ, Brager MD, Windsor RE, Pollack SR, Vreslovic EJ, Kotwick JE. Fracture healing in the  
428 rabbit fibula when subjected to various capacitively coupled electrical fields. *Journal of Orthopaedic Research*.  
429 1985; 3(3):331–340. doi: [10.1002/jor.1100030310](https://doi.org/10.1002/jor.1100030310).
- 430 **Brugués A**, Anon E, Conte V, Veldhuis JH, Gupta M, Colombelli J, Muñoz JJ, Brodland GW, Ladoux B, Trepat X.  
431 Forces driving epithelial wound healing. *Nature Physics*. 2014; doi: [10.1038/NPHYS3040](https://doi.org/10.1038/NPHYS3040).
- 432 **Cho Y**, Son M, Jeong H, Shin JH. Electric field-induced migration and intercellular stress alignment in a collective  
433 epithelial monolayer. *Molecular Biology of the Cell*. 2018; doi: [10.1091/mbc.E18-01-0077](https://doi.org/10.1091/mbc.E18-01-0077).
- 434 **Ferrier J**, Ross SM, Kanehisa J, Aubin JE. Osteoclasts and osteoblasts migrate in opposite directions in response  
435 to a constant electrical field. *JCell Physiol*. 1986 dec; 129(0021-9541 (Linking)):283–288.
- 436 **Grueler H**, Nuccitelli R. The Galvanotaxis response mechanism of keratinocytes can be modeled as a propor-  
437 tional controller. *Cell Biochemistry and Biophysics*. 2000; doi: [10.1385/cbb:33:1:33](https://doi.org/10.1385/cbb:33:1:33).
- 438 **Guido I**, Diehl D, Olszok NA, Bodenschatz E. Cellular velocity, electrical persistence and sensing in developed  
439 and vegetative cells during electro taxis. *PLoS ONE*. 2020; doi: [10.1371/journal.pone.0239379](https://doi.org/10.1371/journal.pone.0239379).
- 440 **Hart FX**, Palisano JR. Glycocalyx bending by an electric field increases cell motility. *Bioelectromagnetics*. 2017;  
441 doi: [10.1002/bem.22060](https://doi.org/10.1002/bem.22060).
- 442 **Henkes S**, Kostanjevec K, Collinson JM, Sknepnek R, Bertin E. Dense active matter model of motion patterns in  
443 confluent cell monolayers. *Nature Communications*. 2020; doi: [10.1038/s41467-020-15164-5](https://doi.org/10.1038/s41467-020-15164-5).

- 444 **Hiemer B**, Ziebart J, Jonitz-Heincke A, Grunert PC, Su Y, Hansmann D, Bader R. Magnetically induced electrostim-  
445 ulation of human osteoblasts results in enhanced cell viability and osteogenic differentiation. *International*  
446 *Journal of Molecular Medicine*. 2016 jul; 38(1):57–64. doi: [10.3892/ijmm.2016.2590](https://doi.org/10.3892/ijmm.2016.2590).
- 447 **Jacobs DJ**, Trivedi D, David C, Yengo CM. Kinetics and thermodynamics of the rate-limiting conformational  
448 change in the actomyosin V mechanochemical cycle. *J Mol Biol*. 2011 apr; 407(0022-2836 (Linking)):716–730.
- 449 **Jhawar J**, Morris RG, Amith-Kumar UR, Danny Raj M, Rogers T, Rajendran H, Guttal V. Noise-induced schooling  
450 of fish. *Nature Physics*. 2020; doi: [10.1038/s41567-020-0787-y](https://doi.org/10.1038/s41567-020-0787-y).
- 451 **Kaivosoja E**, Sariola V, Chen Y, Konttinen YT. The effect of pulsed electromagnetic fields and dehydroepiandrosterone on viability and osteo-induction of human mesenchymal stem cells. *Journal of Tissue Engineering and*  
452 *Regenerative Medicine*. 2015 jan; 9(1):31–40. doi: [10.1002/term.1612](https://doi.org/10.1002/term.1612).
- 454 **Lara Rodriguez L**, Schneider IC, Directed cell migration in multi-cue environments; 2013. doi:  
455 [10.1039/c3ib40137e](https://doi.org/10.1039/c3ib40137e).
- 456 **Liang Y**, Tian H, Liu J, Lv YL, Wang Y, Zhang JP, Huang YS. Application of stable continuous ex-  
457 ternal electric field promotes wound healing in pig wound model. *Bioelectrochemistry*. 2020; doi:  
458 [10.1016/j.bioelechem.2020.107578](https://doi.org/10.1016/j.bioelechem.2020.107578).
- 459 **Lin BJ**, Tsao SH, Chen A, Hu SK, Chao L, Chao PHG. Lipid rafts sense and direct electric field-induced mi-  
460 gration. *Proceedings of the National Academy of Sciences of the United States of America*. 2017; doi:  
461 [10.1073/pnas.1702526114](https://doi.org/10.1073/pnas.1702526114).
- 462 **Lochner K**, Fritsche A, Jonitz A, Hansmann D, Mueller P, Mueller-Hilke B, Bader R. The potential role of hu-  
463 man osteoblasts for periprosthetic osteolysis following exposure to wear particles. *International Journal of*  
464 *Molecular Medicine*. 2011; doi: [10.3892/ijmm.2011.778](https://doi.org/10.3892/ijmm.2011.778).
- 465 **Merkel M**, Manning ML, Using cell deformation and motion to predict forces and collective behavior in mor-  
466 phogenesis; 2017. doi: [10.1016/j.semcdb.2016.07.029](https://doi.org/10.1016/j.semcdb.2016.07.029).
- 467 **Piotrowski-Daspit ASA**. Physical Forces and Collective Cell Migration in Development and Disease. PhD thesis;  
468 2016.
- 469 **Rohde M**, Ziebart J, Kirschstein T, Sellmann T, Porath K, Kühl F, Delenda B, Bahls C, van Rienen U, Bader R,  
470 Köhling R. Human Osteoblast Migration in DC Electrical Fields Depends on Store Operated Ca<sup>2+</sup>-Release  
471 and Is Correlated to Upregulation of Stretch-Activated TRPM7 Channels. *Frontiers in Bioengineering and*  
472 *Biotechnology*. 2019; doi: [10.3389/fbioe.2019.00422](https://doi.org/10.3389/fbioe.2019.00422).
- 473 **Saltukoglu D**, Grünwald J, Strohmeier N, Bensch R, Ulbrich MH, Ronneberger O, Simons M. Spontaneous and  
474 electric field-controlled front-rear polarization of human keratinocytes. *Molecular Biology of the Cell*. 2015;  
475 doi: [10.1091/mbc.E14-12-1580](https://doi.org/10.1091/mbc.E14-12-1580).
- 476 **Sato MJ**, Kuwayama H, Van Egmond WN, Takayama ALK, Takagi H, Van Haastert PJM, Yanagida T, Ueda M.  
477 Switching direction in electric-signal-induced cell migration by cyclic guanosine monophosphate and phos-  
478 phatidylinositol signaling. *Proceedings of the National Academy of Sciences of the United States of America*.  
479 2009; doi: [10.1073/pnas.0809974106](https://doi.org/10.1073/pnas.0809974106).
- 480 **Schienbein M**, Gruler H. Langevin equation, Fokker-Planck equation and cell migration. *Bulletin of Mathemat-*  
481 *ical Biology*. 1993; doi: [10.1007/BF02460652](https://doi.org/10.1007/BF02460652).
- 482 **Sich NM**, O'Donnell TJ, Coulter SA, John OA, Carter MS, Cremo CR, Baker JE. Effects of actin-myosin kinetics on  
483 the calcium sensitivity of regulated thin filaments. *J Biol Chem*. 2010 dec; 285(0021-9258 (Linking)):39150–  
484 39159.



- 485 **Simpson MJ**, Lo KY, Sun YS. Quantifying the roles of random motility and directed motility using advection-  
486 diffusion theory for a 3T3 fibroblast cell migration assay stimulated with an electric field. *BMC Systems*  
487 *Biology*. 2017; doi: 10.1186/s12918-017-0413-5.
- 488 **Stains JP**, Civitelli R. Cell-to-cell interactions in bone; 2005. doi: [10.1016/j.bbrc.2004.11.078](https://doi.org/10.1016/j.bbrc.2004.11.078).
- 489 **Stains JP**, Fontana F, Civitelli R. Intercellular junctions and cell-cell communication in the skeletal system. In:  
490 *Principles of Bone Biology*; 2019. doi: [10.1016/B978-0-12-814841-9.00018-X](https://doi.org/10.1016/B978-0-12-814841-9.00018-X).
- 491 **Szabó B**, Szöllösi GJ, Gönci B, Jurányi Z, Selmeczi D, Vicsek T. Phase transition in the collective migration of  
492 tissue cells: Experiment and model. *Physical Review E - Statistical, Nonlinear, and Soft Matter Physics*. 2006;  
493 doi: [10.1103/PhysRevE.74.061908](https://doi.org/10.1103/PhysRevE.74.061908).
- 494 **Tai G**, Reid B, Cao L, Zhao M. Electrotaxis and wound healing: experimental methods to study electric fields as  
495 a directional signal for cell migration. *Methods in molecular biology* (Clifton, NJ). 2009; doi: 10.1007/978-1-  
496 60761-198-1\_5.
- 497 **Thurley K**, Wu LF, Altschuler SJ. Modeling Cell-to-Cell Communication Networks Using Response-Time Distri-  
498 butions. *Cell Systems*. 2018; doi: [10.1016/j.cels.2018.01.016](https://doi.org/10.1016/j.cels.2018.01.016).
- 499 **Trepat X**, Wasserman MR, Angelini TE, Millet E, Weitz DA, Butler JP, Fredberg JJ. Physical forces during collective  
500 cell migration. *Nature Physics*. 2009; doi: 10.1038/nphys1269.
- 501 **Vanegas-Acosta JC**, Garzón-Alvarado DA, Zwamborn APM. Mathematical model of electrotaxis in osteoblastic  
502 cells. *Bioelectrochemistry*. 2012; doi: [10.1016/j.bioelechem.2012.08.002](https://doi.org/10.1016/j.bioelechem.2012.08.002).
- 503 **Vicsek T**, Czirak A, Ben-Jacob E, Cohen I, Shochet O. Novel type of phase transition in a system of self-driven  
504 particles. *Physical Review Letters*. 1995; doi: [10.1103/PhysRevLett.75.1226](https://doi.org/10.1103/PhysRevLett.75.1226).
- 505 **Waters CM**, Bassler BL. Quorum sensing: Cell-to-cell communication in bacteria; 2005. doi: [10.1146/an-  
506 nurev.cellbio.21.012704.131001](https://doi.org/10.1146/annurev.cellbio.21.012704.131001).
- 507 **Wu D**, Lin F. A receptor-electromigration-based model for cellular electrotactic sensing and migration. *Bio-  
508 chemical and Biophysical Research Communications*. 2011; doi: [10.1016/j.bbrc.2011.07.004](https://doi.org/10.1016/j.bbrc.2011.07.004).
- 509 **Zajdel TJ**, Shim G, Wang L, Rossello-Martinez A, Cohen DJ. SCHEPDOG: Programming Electric Cues to Dynam-  
510 ically Herd Large-Scale Cell Migration. *Cell Systems*. 2020; doi: [10.1016/j.cels.2020.05.009](https://doi.org/10.1016/j.cels.2020.05.009).
- 511 **Zhao M**, Pu J, Forrester JV, McCaig CD. Membrane lipids, EGF receptors, and intracellular signals colocalize  
512 and are polarized in epithelial cells moving directionally in a physiological electric field. *The FASEB journal :*  
513 *official publication of the Federation of American Societies for Experimental Biology*. 2002; doi: [10.1096/fj.01-  
514 0811fje](https://doi.org/10.1096/fj.01-0811fje).
- 515 **Zhao Z**, Watt C, Karystinou A, Roelofs AJ, McCaig CD, Gibson IR, De Bari C. Directed migration of human bone  
516 marrow mesenchymal stem cells in a physiological direct current electric field. *European Cells and Materials*.  
517 2011; doi: [10.22203/eCM.v022a26](https://doi.org/10.22203/eCM.v022a26).

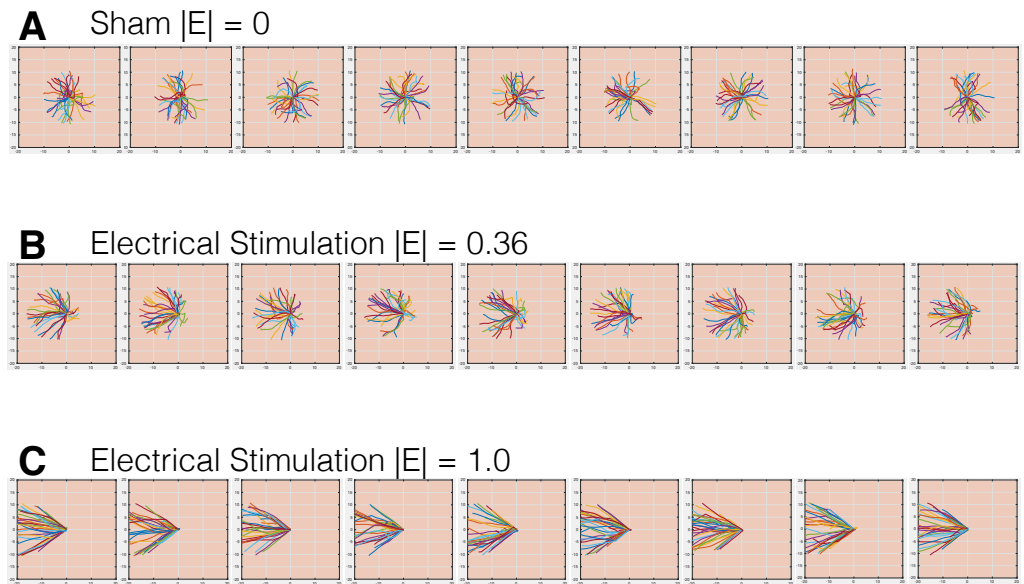

**Figure 3–Figure supplement 1.** Simulation results of ten separate simulation runs in the case of **(A)** no electrical stimulation, which corresponds to experimental sham, **(B)** stimulation with electrical field amplitude of 0.36, which corresponds to the experimental field stimulation strength of 160 V/m, and, **(C)** stimulation with electrical field amplitude of 1, which corresponds to the experimental field stimulation strength of 436 V/m.
